# Supplementary material for: A method of calculating surface energies for asymmetric slab models
Source: Royal Society of Chemistry journal article supplement (doi:10.1039/d2cp04460a), 2023-01-01
Supplement: d2cp04460a1.pdf [file d2cp04460a1.pdf]

## **A Method of Calculating Surface Energies for Asymmetric Slab Models**

Natalie M. Stuart and Karl Sohlberg

Table S1.  $\text{TiO}_2$ ,  $\text{SnO}_2$ ,  $\text{MoO}_3$ ,  $\text{MoP}$  models with respective k-point grids

|                | $\text{TiO}_2$ rutile (001) | $\text{SnO}_2$ rutile (110) | $\text{SnO}_2$ rutile (101) | $\text{TiO}_2$ rutile (110) | $\text{MoO}_3$ (010) | $\text{MoP}$ (001) | $\text{MoP}$ (111) | $\text{MoP}$ (100) |
|----------------|-----------------------------|-----------------------------|-----------------------------|-----------------------------|----------------------|--------------------|--------------------|--------------------|
| Optimized bulk | 3x3x5                       | 3x3x4                       | 3x3x4                       | 3x3x5                       | 4x1x4                | 15x15x15           | 15x15x15           | 15x15x15           |
| Slab models    | 3x3x1                       | 2x2x1                       | 3x3x1                       | 5x3x1                       | 4x4x1                | 5x5x1              | 5x8x1              | 4x5x1              |

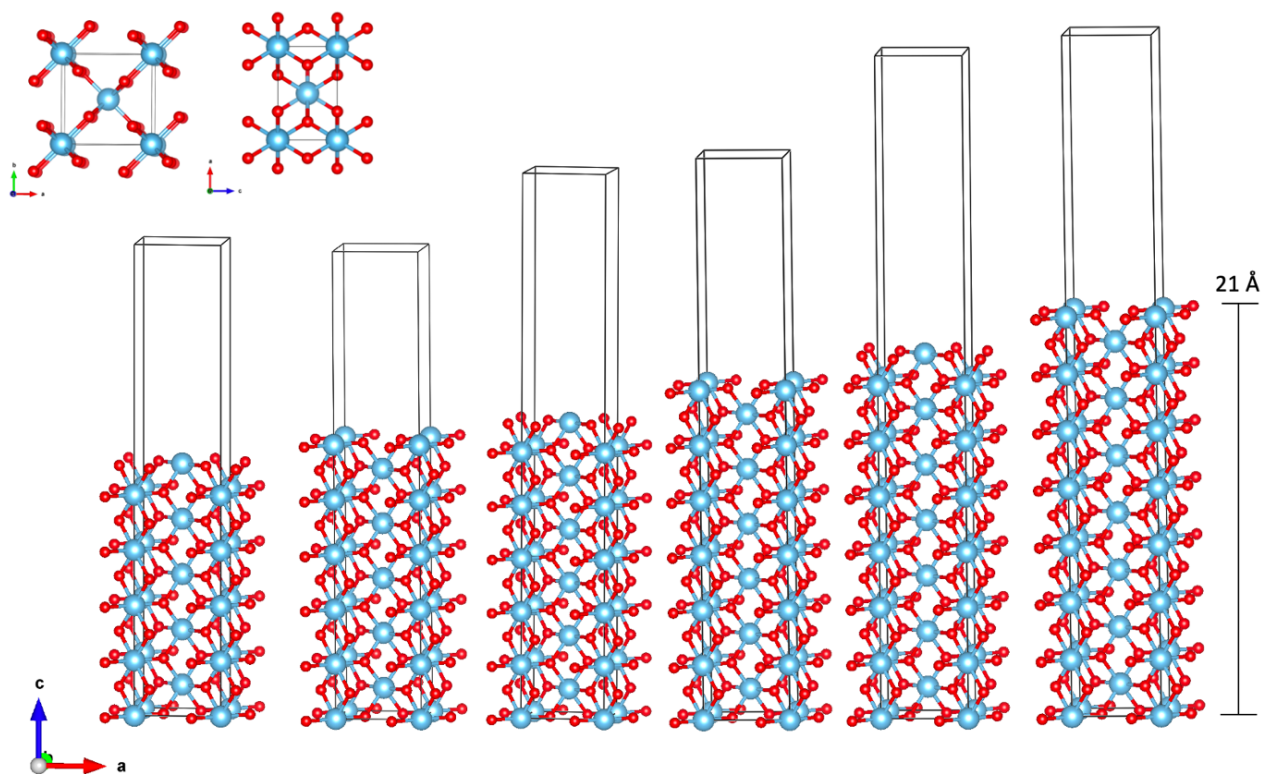

Figure S1.  $\text{TiO}_2$  rutile optimized bulk & slab structures featuring both asymmetric and symmetric models. From left to right the models feature 10, 11, 12, 13, 14, and 15 layers. The slabs with even numbers of layers are asymmetric, while those with odd numbers of layers are symmetric.

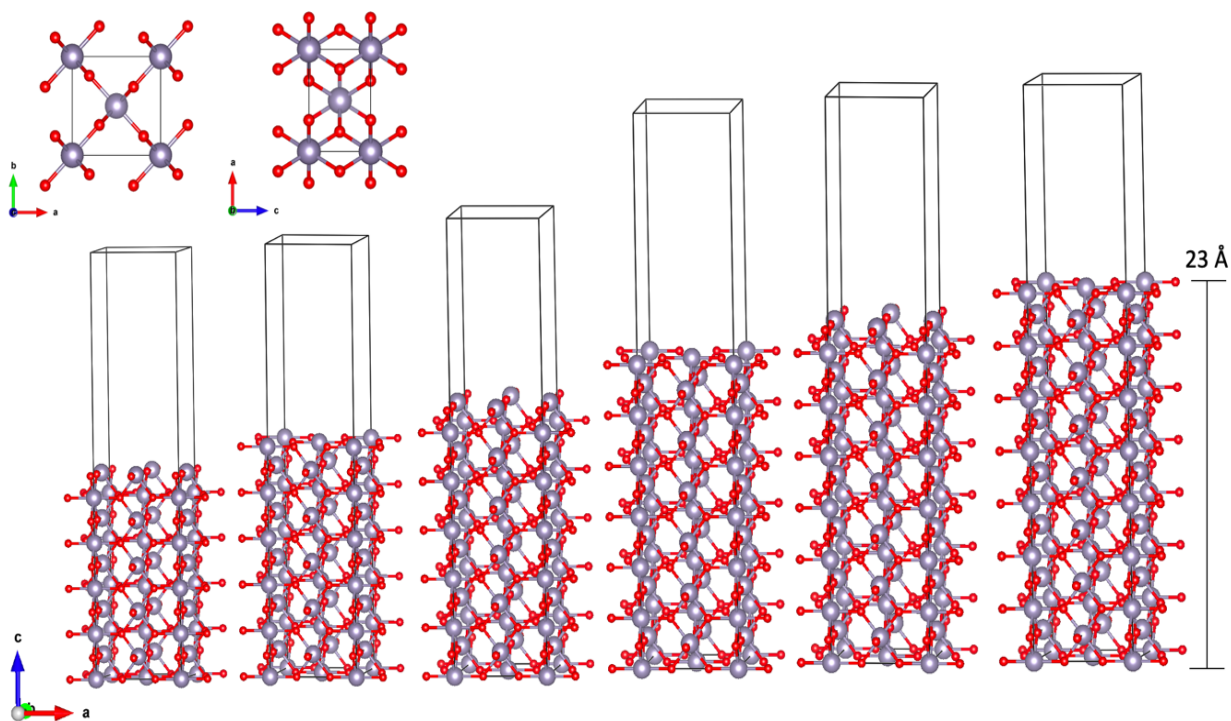

Figure S2.  $\text{SnO}_2$  rutile optimized bulk & slab structures featuring both asymmetric and symmetric models. From left to right the models feature 10, 11, 12, 13, 14, and 15 layers. The slabs with even numbers of layers are asymmetric, while those with odd numbers of layers are symmetric.

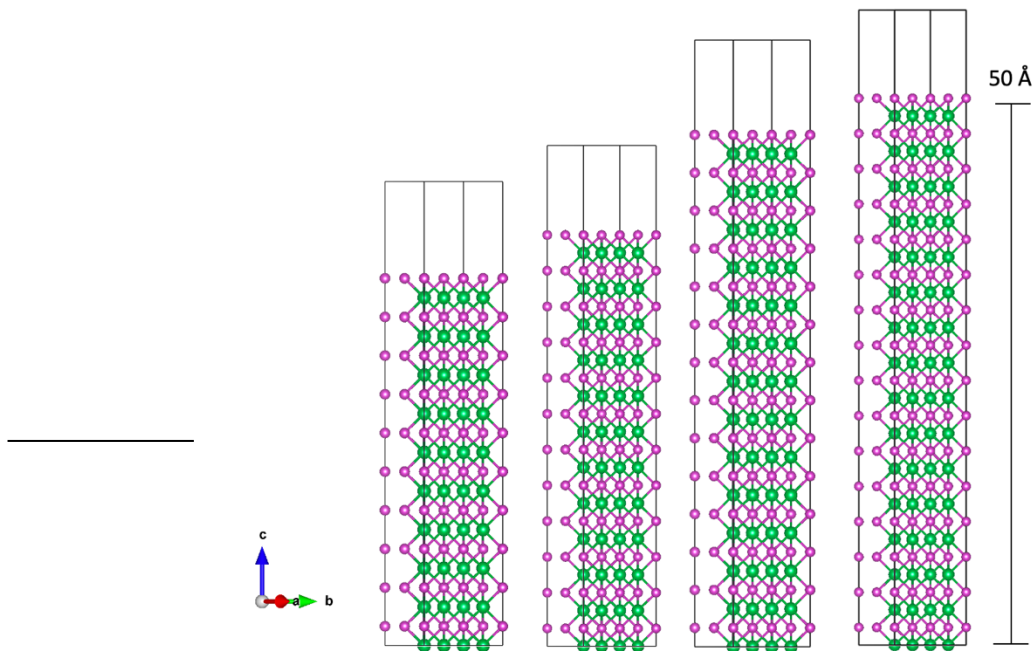

Figure S3. MoP (001) asymmetric slab models with 10, 12, 14, and 16 Mo-P layers.

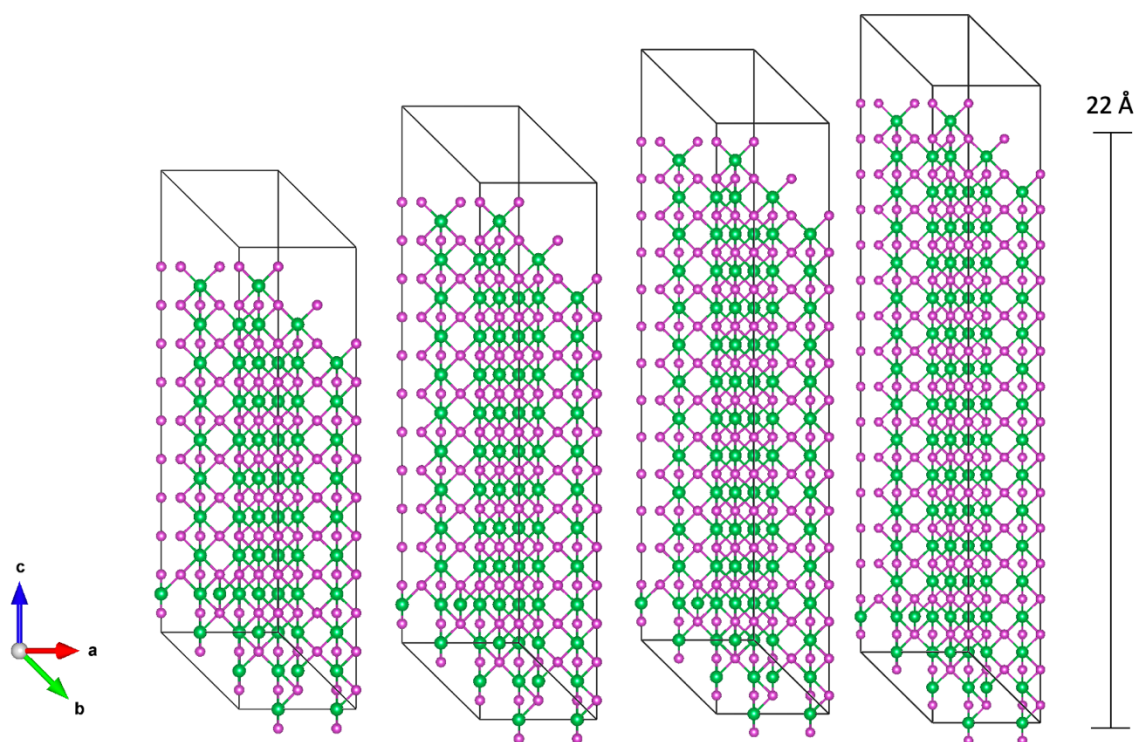

Figure S4. MoP (111) asymmetric slab models with 10, 12, 14, and 16 Mo-P layers.

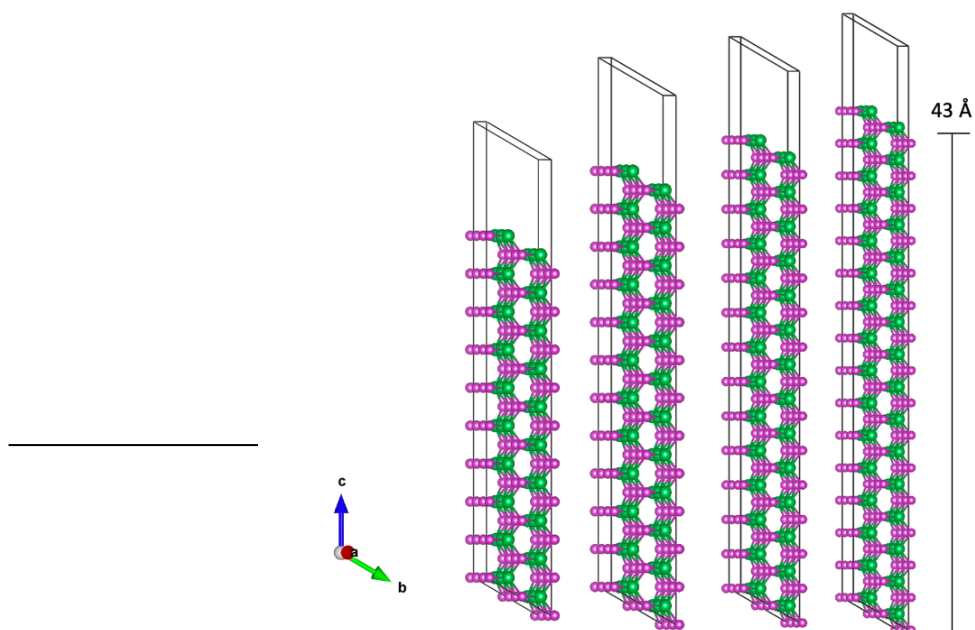

Figure S5. MoP slabs exposing the (100) surface. Asymmetric models are shown with 10, 12, 14, and 16 Mo-P layers.

#### Symmetric TiO<sub>2</sub> and SnO<sub>2</sub> slabs:

---

The (001) surface of TiO<sub>2</sub> exhibits very similar atomic structure for the A and B terminations, which feature a combination of titanium and oxygen atoms. Thus, it is to be expected that these surfaces have very similar energy values. The simultaneous equations method yields surface energies of 1.28 J/m<sup>2</sup> for both A and B. The cleavage energy method yields surface energies of 1.27 and 1.28 J/m<sup>2</sup> for A and B, respectively. The values of  $(E_a^r, E_b^r)$  generated by the simultaneous equations method and  $(\gamma_A, \gamma_B)$  generated by the cleavage energy method are, on average, only 0.28 percent different from each other. Using the single surface approximation (Equation 1), the surface energies of A and B are both 1.28 J/m<sup>2</sup>. All of the computed surface energies differ by <3% from the literature value of 1.25 J/m<sup>2</sup> reported by Perron et al.<sup>1</sup>

The (110) surfaces of tin dioxide rutile are also comprised of stacked metal-oxide layers. The two terminations are more nearly equivalent than the analogous (*hkl*) surfaces of the isostructural titanium dioxide. Thus, again it is expected that there should not be a difference in surface energy between A and B. Application of the simultaneous equations method generated energies of 1.86 and 1.86 J/m<sup>2</sup> for relaxed A and B surfaces, respectively, whereas application of the cleavage energy method yielded surface energies of 1.88 and 1.85 J/m<sup>2</sup>. The values of  $(E_a^r, E_b^r)$  generated by the simultaneous equations method and  $(\gamma_A, \gamma_B)$  generated by the cleavage energy method differ by only 0.25 percent on average. The single-surface approximation via Equation 1 yields a surface energy of 1.86 J/m<sup>2</sup>. All of the computed surface energies differ by <4.1% from the literature value of 1.80 J/m<sup>2</sup> reported by Wexler et al. for both A and B surfaces of (110) SnO<sub>2</sub>.<sup>2</sup>

Table S3. Calculated Surface Energies for Low-Index Surfaces of MoP Generated using the Simultaneous Equations Method

| Material | Surface | Energy values (J/m <sup>2</sup> ) |           |           |           |           | Literature (Tian et al 2018) | Single surface approximation |
|----------|---------|-----------------------------------|-----------|-----------|-----------|-----------|------------------------------|------------------------------|
|          |         | Energies                          | 10 layers | 12 layers | 14 layers | 16 layers |                              |                              |
| MoP      | 111     | A                                 | 2.34      | 2.34      | 2.34      | 2.34      | 2.48                         | 2.30 J/m <sup>2</sup>        |
|          |         | B                                 | 2.27      | 2.27      | 2.27      | 2.27      | 2.19                         |                              |
|          | 100     | A                                 | 1.95      | 1.93      | 1.91      | 1.89      | 1.93                         | 1.97 J/m <sup>2</sup>        |
|          |         | B                                 | 2.09      | 2.06      | 2.05      | 2.03      | 2.28                         |                              |
|          | 001     | A                                 | 2.80      | 2.79      | 2.77      | 2.76      | 2.98                         | 2.69 J/m <sup>2</sup>        |
|          |         | B                                 | 2.61      | 2.60      | 2.58      | 2.57      | 2.56                         |                              |

Table S4. Calculated Surface Energies for Low-Index Surfaces of MoP using Cleavage Energy Method

| Material | Surface | Energy values (J/m <sup>2</sup> ) |           |           |           |           | Literature (Tian et al 2018) | Single surface approximation |
|----------|---------|-----------------------------------|-----------|-----------|-----------|-----------|------------------------------|------------------------------|
|          |         | Energies                          | 10 layers | 12 layers | 14 layers | 16 layers |                              |                              |
| MoP      | 111     | A                                 | 2.38      | 2.38      | 2.38      | 2.37      | 2.48                         | 2.30 J/m <sup>2</sup>        |
|          |         | B                                 | 2.22      | 2.23      | 2.22      | 2.22      | 2.19                         |                              |
|          | 100     | A                                 | 1.87      | 1.84      | 1.83      | 1.83      | 1.93                         | 1.97 J/m <sup>2</sup>        |
|          |         | B                                 | 2.17      | 2.15      | 2.14      | 2.14      | 2.28                         |                              |
|          | 001     | A                                 | 2.92      | 2.91      | 2.89      | 2.88      | 2.98                         | 2.69 J/m <sup>2</sup>        |
|          |         | B                                 | 2.49      | 2.49      | 2.46      | 2.45      | 2.56                         |                              |

Table S5. Calculated Surface Energies for Low-Index Surfaces of TiO<sub>2</sub> and SnO<sub>2</sub> with respect to Slab Height. All surface energies are in J/m<sup>2</sup>.

| Material                            | Method                    | GGA<br>PW91                     | Number of atomic layers |           |      |           |      |           |      |           |      |           |      |           | Literature<br>value<br>(J/m <sup>2</sup> )                  |
|-------------------------------------|---------------------------|---------------------------------|-------------------------|-----------|------|-----------|------|-----------|------|-----------|------|-----------|------|-----------|-------------------------------------------------------------|
|                                     |                           | Energies<br>(J/m <sup>2</sup> ) | 10                      | 10<br>FIL | 11   | 11<br>FIL | 12   | 12<br>FIL | 13   | 13<br>FIL | 14   | 14<br>FIL | 15   | 15<br>FIL |                                                             |
| (001)<br>TiO <sub>2</sub><br>rutile | Cleavage<br>Energy        | $\gamma_A$                      | 1.31                    | 1.31      | 1.26 | 1.26      | 1.26 | 1.26      | 1.27 | 1.27      | 1.27 | 1.27      | 1.25 | 1.25      | 1.25<br>(GGA<br>PW91)<br>Perron et<br>al. 2007 <sup>2</sup> |
|                                     |                           | $\gamma_B$                      | 1.31                    | 1.31      | 1.32 | 1.32      | 1.26 | 1.26      | 1.26 | 1.26      | 1.27 | 1.27      | 1.28 | 1.28      |                                                             |
|                                     | Simultaneous<br>Equations | $E_a^f$                         | 2.43                    | 2.39      | 2.40 | 2.39      | 2.42 | 2.40      | 2.39 | 2.40      | 2.44 | 2.43      | 2.44 | 2.43      |                                                             |
|                                     |                           | $E_b^f$                         | 2.43                    | 2.39      | 2.35 | 2.39      | 2.43 | 2.40      | 2.40 | 2.40      | 2.44 | 2.43      | 2.42 | 2.43      |                                                             |
|                                     |                           | $E_a^r$                         | 1.19                    | 1.33      | 1.32 | 1.32      | 1.21 | 1.33      | 1.29 | 1.29      | 1.22 | 1.28      | 1.28 | 1.28      |                                                             |
| $E_b^r$                             | 1.19                      | 1.33                            | 1.32                    | 1.32      | 1.21 | 1.33      | 1.29 | 1.29      | 1.22 | 1.28      | 1.28 | 1.28      | 1.28 |           |                                                             |
| Slab Thickness (Å)                  |                           |                                 | 13.2                    | 13.2      | 14.7 | 14.7      | 16.1 | 16.1      | 17.6 | 17.6      | 19.1 | 19.1      | 20.5 | 20.5      |                                                             |
| (110)<br>SnO <sub>2</sub><br>rutile | Cleavage<br>Energy        | $\gamma_A$                      | 1.85                    | 1.87      | 1.84 | 1.86      | 1.84 | 1.86      | 1.85 | 1.85      | 1.84 | 1.86      | 2.12 | 1.85      | 1.80<br>(GGA<br>PBE)<br>Wexler et<br>al. 2014 <sup>3</sup>  |
|                                     |                           | $\gamma_B$                      | 1.85                    | 1.87      | 1.85 | 1.86      | 1.84 | 1.86      | 1.85 | 1.85      | 1.84 | 1.86      | 1.85 | 1.85      |                                                             |
|                                     | Simultaneous<br>Equations | $E_a^f$                         | 2.37                    | 2.38      | 2.37 | 2.38      | 2.38 | 2.38      | 2.39 | 2.39      | 2.40 | 2.40      | 2.34 | 2.41      |                                                             |
|                                     |                           | $E_b^f$                         | 2.37                    | 2.35      | 2.37 | 2.38      | 2.38 | 2.38      | 2.39 | 2.39      | 2.40 | 2.40      | 2.56 | 2.41      |                                                             |
|                                     |                           | $E_a^r$                         | 1.85                    | 1.88      | 1.86 | 1.86      | 1.85 | 1.85      | 1.85 | 1.86      | 1.85 | 1.86      | 1.90 | 1.86      |                                                             |
| $E_b^r$                             | 1.85                      | 1.85                            | 1.86                    | 1.86      | 1.85 | 1.85      | 1.85 | 1.86      | 1.85 | 1.86      | 1.86 | 1.86      | 1.85 |           |                                                             |
| Slab Thickness (Å)                  |                           |                                 | 14.4                    | 14.4      | 16.0 | 16.0      | 17.5 | 17.5      | 19.2 | 19.2      | 20.7 | 20.7      | 22.3 | 22.3      |                                                             |

Table S6. Percent differences in relaxed surface energy values for TiO<sub>2</sub> and SnO<sub>2</sub> surfaces, as calculated via Simultaneous Equations and Cleavage Energy methods.

| Material                            | Compared Values       | Number of atomic layers |           |       |           |       |           |       |           |       |           |       |           |
|-------------------------------------|-----------------------|-------------------------|-----------|-------|-----------|-------|-----------|-------|-----------|-------|-----------|-------|-----------|
|                                     |                       | 10                      | 10<br>FIL | 11    | 11<br>FIL | 12    | 12<br>FIL | 13    | 13<br>FIL | 14    | 14<br>FIL | 15    | 15<br>FIL |
| (001)<br>TiO <sub>2</sub><br>rutile | $\gamma_A$ vs $E_a^r$ | 8.95                    | 1.87      | 4.18  | 4.64      | 4.53  | 5.28      | 1.96  | 2.02      | 3.56  | 0.919     | 2.05  | 2.09      |
|                                     | $\gamma_B$ vs $E_b^r$ | 8.95                    | 1.87      | 0.436 | 0.507     | 3.90  | 5.22      | 2.72  | 2.96      | 3.60  | 0.885     | 0.178 | 0.385     |
| (110)<br>SnO <sub>2</sub><br>rutile | $\gamma_A$ vs $E_a^r$ | 0.293                   | 0.829     | 0.655 | 0.124     | 0.515 | 0.725     | 0.452 | 0.166     | 0.524 | 0.0276    | 10.8  | 0.210     |
|                                     | $\gamma_B$ vs $E_b^r$ | 0.328                   | 0.689     | 0.328 | 0.178     | 0.550 | 0.647     | 0.488 | 0.166     | 0.524 | 0.0348    | 0.490 | 0.0862    |

Table S7. Percent Differences Between Summed Surface Energies of Relaxed A, B Terminations and Total Relaxed Surface Energy for Both Methods.

| Material                         | Compared Values                                        | Number of atomic layers |           |      |           |      |           |      |           |      |           |      |           |
|----------------------------------|--------------------------------------------------------|-------------------------|-----------|------|-----------|------|-----------|------|-----------|------|-----------|------|-----------|
|                                  |                                                        | 10                      | 10<br>FIL | 11   | 11<br>FIL | 12   | 12<br>FIL | 13   | 13<br>FIL | 14   | 14<br>FIL | 15   | 15<br>FIL |
| (001) TiO <sub>2</sub><br>rutile | Cleavage Energy ( $\gamma_A + \gamma_B$ ) vs $\delta$  | 10                      | 1.8       | 2.6  | 2.6       | 4.7  | 5.3       | 2.7  | 2.7       | 4.0  | 0.87      | 1.3  | 1.3       |
|                                  | Simultaneous Equations ( $E_a^r + E_b^r$ ) vs $\delta$ | 1.1                     | 0.07      | 0.32 | 0.06      | 0.50 | 0.02      | 0.31 | 0.23      | 0.43 | 0.04      | 0.14 | 0.03      |
| (110) SnO <sub>2</sub><br>rutile | Cleavage Energy ( $\gamma_A + \gamma_B$ ) vs $\delta$  | 0.38                    | 0.09      | 0.61 | 0.19      | 0.66 | 0.09      | 0.58 | 0.21      | 0.65 | 0.04      | 6.7  | 0.18      |
|                                  | Simultaneous Equations ( $E_a^r + E_b^r$ ) vs $\delta$ | 0.07                    | 0.02      | 0.12 | 0.04      | 0.13 | 0.77      | 0.11 | 0.04      | 0.12 | 0.01      | 1.2  | 0.03      |
